# Supplementary material for: Necessity of two-dimensional visualization of validity in the nanomechanical mapping of atomic force microscopy for sulphur cross-linked rubber
Source: Royal Society of Chemistry journal article supplement (doi:10.1039/c8ra06669h), 2018-01-01
Supplement: c8ra06669h1.pdf [file c8ra06669h1.pdf]

## Supporting Information

### **Necessity of Two-dimensional Visualization of Validity in the Nanomechanical Mapping of Atomic Force Microscopy for Sulfur Cross-linked Rubber**

Takumi Ohashi<sup>a,b</sup>, Tomoyuki Sato<sup>a</sup>, Taichi Nakajima<sup>a</sup>, Preeyanuch Junkong<sup>b,c</sup> and Yuko Ikeda<sup>\*b,d</sup>

<sup>a</sup>*Graduate School of Science and Technology, Kyoto Institute of Technology, Matsugasaki, Sakyo, Kyoto 606-8585, Japan*

<sup>b</sup>*Centre for Rubber Science and Technology, Kyoto Institute of Technology, Matsugasaki, Sakyo, Kyoto 606-8585, Japan.*

<sup>c</sup>*Research Strategy Promotion Centre, Kyoto Institute of Technology, Matsugasaki, Sakyo, Kyoto 606-8585, Japan*

<sup>d</sup>*Faculty of Molecular Chemistry and Engineering, Kyoto Institute of Technology, Matsugasaki, Sakyo, Kyoto 606-8585, Japan.*

\*Corresponding author  
E-mail: yuko@kit.ac.jp.

## The method to convert the force curve to the force-deformation curve

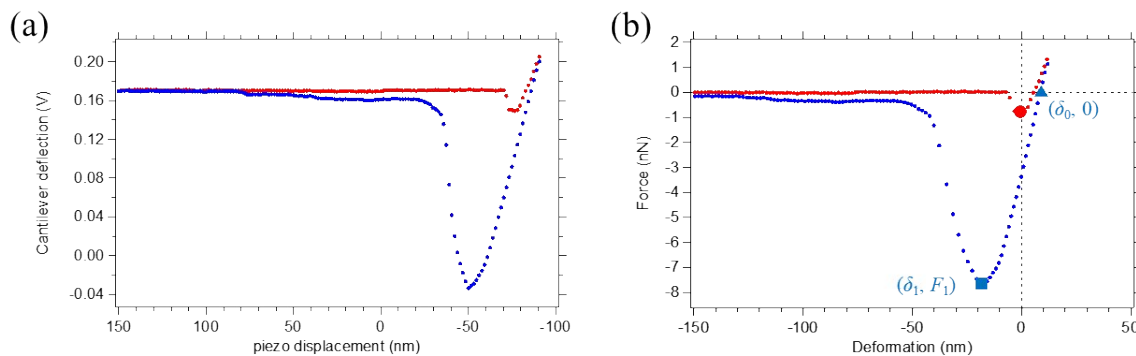

**Fig. S1.** An example of (a) force curves and (b) experimental force-deformation curves. Red dot is approaching process and blue dot is withdrawing process. The close circle (●) is the “jump-in-contact point”, close triangle (▲) is the “balance point”  $(\delta_0, 0)$ , and the close square (■) is the “max-adhesion point” or “pull-off point”  $(\delta_1, F_1)$ .

In general, the z-piezo displacement [nm] and cantilever deflection [V] are the data obtained from the force curve mapping measurement. An example of force curves for rubber sample is shown in Fig. S1(a). Optical lever method is used in almost all AFM modes.<sup>2</sup> Laser is exposed at the back of cantilevers, and the cantilever deflection is detected from the changing positions of reflected ray. By applying with the spring constant [N/m] and sensitivity of cantilever [nm/V], cantilever deflection [V] is easily converted to force [nN]. Moreover, z-piezo displacement can also be converted to the sample deformation ( $\delta$ ), which can be defined as the remainder between z-piezo displacement [nm] and cantilever deflection [nm]. An example of force-deformation curves converted from their force curve is shown in Fig. S1(b). The details of calculation were already explained by Nakajima *et al.*<sup>10</sup>

### References

- 2 P. Eaton and P. West, *Atomic Force Microscopy*, Oxford University Press, Oxford, 2010.
- 10 K. Nakajima, M. Ito, D. Wang, H. Liu, H. K. Nguyen, X. Liang, A. Kumagai, S. Fujinami, *Microscopy*, 2014, **63**, 193–208.
